# Supplementary material
Source: PubMed Central journal article supplement (PMC4623991)
Supplement: NIHMS727721-supplement-4.pdf [file NIHMS727721-supplement-4.pdf]

A

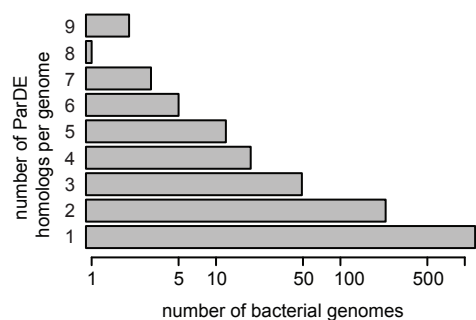

B

|    | Species                                                    | Name              | ParD NCBI GeneID | ParE NCBI GeneID |
|----|------------------------------------------------------------|-------------------|------------------|------------------|
| 1  | <i>Methylobacterium populi</i> BJ001                       | <i>Mp parDE1</i>  | 188584325        | 188584324        |
| 2  | <i>Methylobacterium populi</i> BJ001                       | <i>Mp parDE2</i>  | 188579862        | 188579861        |
| 3  | <i>Methylobacterium populi</i> BJ001                       | <i>Mp parDE3</i>  | 188584614        | 188584613        |
| 4  | <i>Methylobacterium populi</i> BJ001                       | <i>Mp parDE4</i>  | 188584366        | 188584365        |
| 5  | <i>Methylobacterium populi</i> BJ001                       | <i>Mp parDE5</i>  | 188583979        | 188583978        |
| 6  | <i>Sphingobium chlorophenicum</i> L-1                      | <i>Sc parDE1</i>  | 334344591        | 334344592        |
| 7  | <i>Sphingobium chlorophenicum</i> L-1                      | <i>Sc parDE2</i>  | 334346364        | 334346365        |
| 8  | <i>Sphingobium chlorophenicum</i> L-1                      | <i>Sc parDE3</i>  | 334346363        | 334346362        |
| 9  | <i>Mesorhizobium opportunistum</i> WSM2075                 | <i>Mo parDE1</i>  | 337266996        | 337266995        |
| 10 | <i>Mesorhizobium opportunistum</i> WSM2075                 | <i>Mo parDE2</i>  | 337269626        | 337269627        |
| 11 | <i>Mesorhizobium opportunistum</i> WSM2075                 | <i>Mo parDE3</i>  | 337270049        | 337270048        |
| 12 | <i>C. crescentus</i> NA1000                                | <i>Cc parDE1</i>  | 221233854        | 221233853        |
| 13 | <i>Sinorhizobium meliloti</i> 1021                         | <i>Sm parDE1</i>  | 16263810         | 16263811         |
| 14 | <i>Sinorhizobium meliloti</i> 1021                         | <i>Sm parDE2</i>  | 15966432         | 15966431         |
| 15 | <i>Paracoccus denitrificans</i> PD1222                     | <i>Pd parDE1</i>  | 119386537        | 119386538        |
| 16 | <i>Paracoccus denitrificans</i> PD1222                     | <i>Pd parDE2</i>  | 119385788        | 119385787        |
| 17 | <i>Rhodopseudomonas palustris</i> BisB18                   | <i>Rp parDE1</i>  | 90423718         | 90423719         |
| 18 | <i>Rhodopseudomonas palustris</i> BisB18                   | <i>Rp parDE2</i>  | 90421684         | 90421683         |
| 19 | <i>Rhizobium leguminosarum</i> bv. <i>Trifolii</i> WSM2304 | <i>Rlt parDE1</i> | 209552210        | 209552209        |
| 20 | <i>Rhizobium leguminosarum</i> bv. <i>Trifolii</i> WSM2304 | <i>Rtl parDE3</i> | 209552404        | 209552403        |
