# Supplementary material
Source: PubMed Central journal article supplement (PMC4623991)

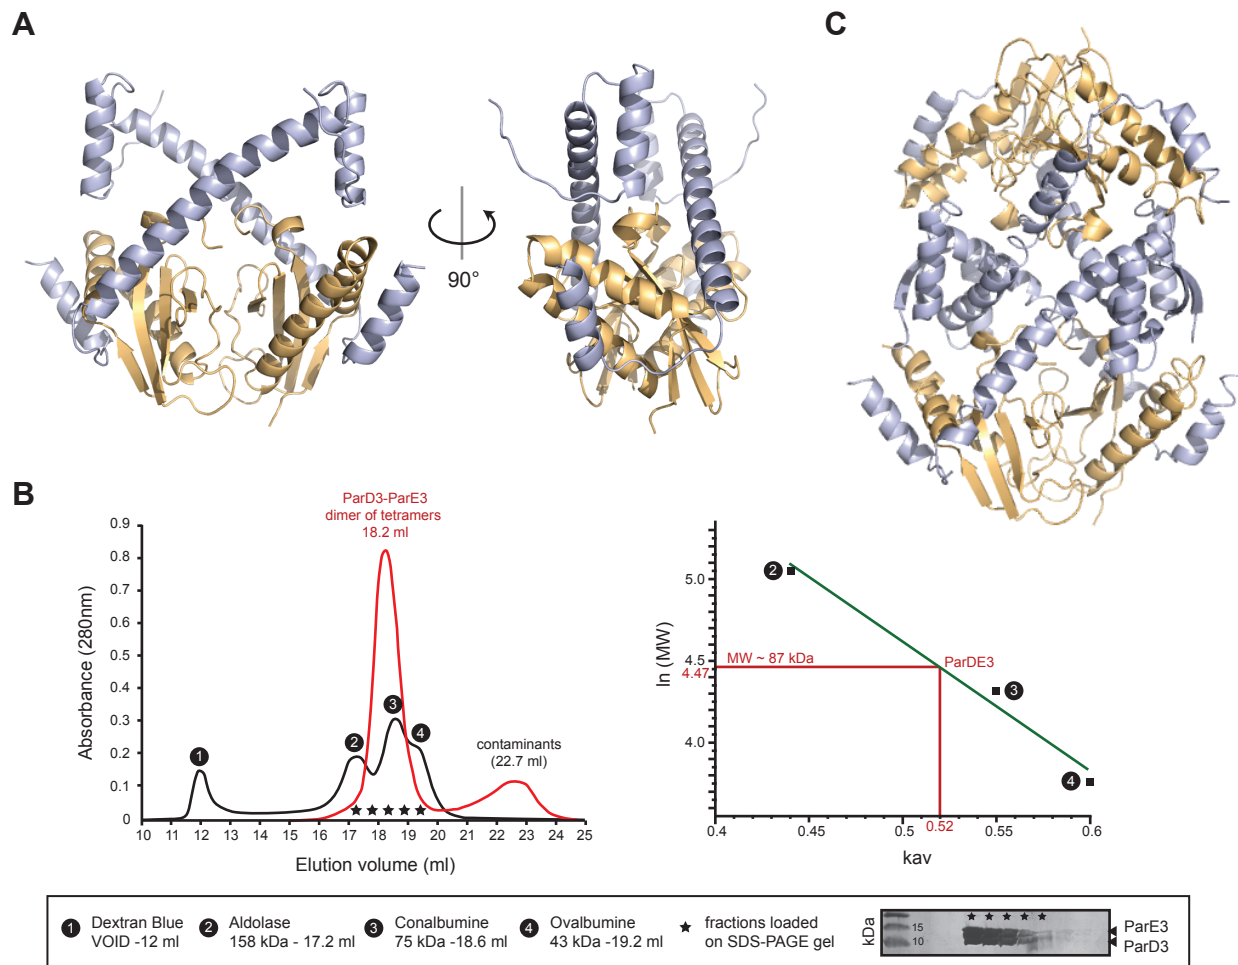

Supplement: NIHMS727721-supplement-5.pdf [file NIHMS727721-supplement-5.pdf]

A

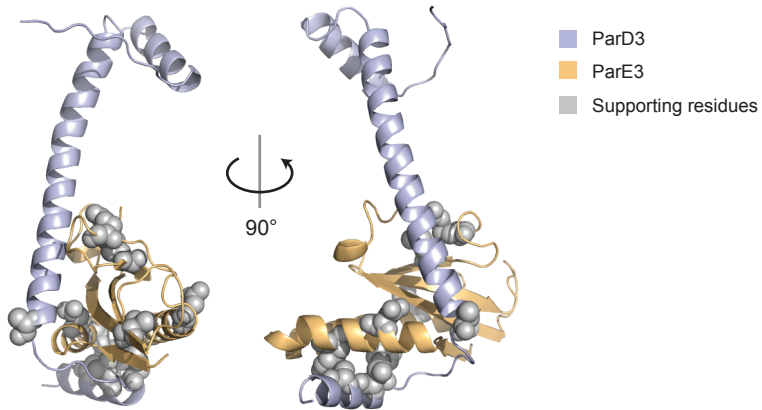

B

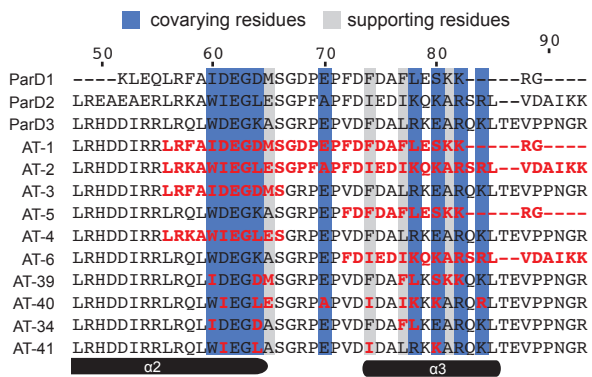

C

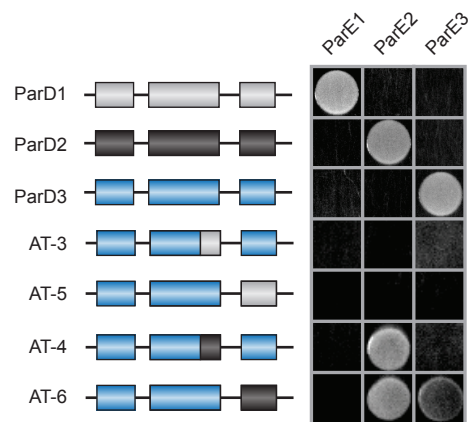

Supplement: NIHMS727721-supplement-6.pdf [file NIHMS727721-supplement-6.pdf]

A

|             | >3 reads     | >10 reads    | >100 reads   |
|-------------|--------------|--------------|--------------|
| replicate 1 | 9290 (99.3%) | 9215 (98.5%) | 8876 (94.8%) |
| replicate 2 | 9292 (99.3%) | 9211 (98.4%) | 8860 (94.7%) |
| both        | 9267 (99.0%) | 9200 (98.3%) | 8835 (94.4%) |

B

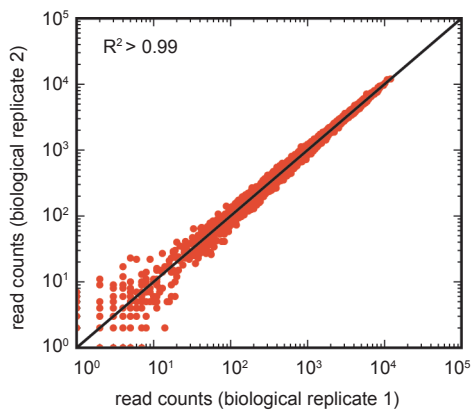

C

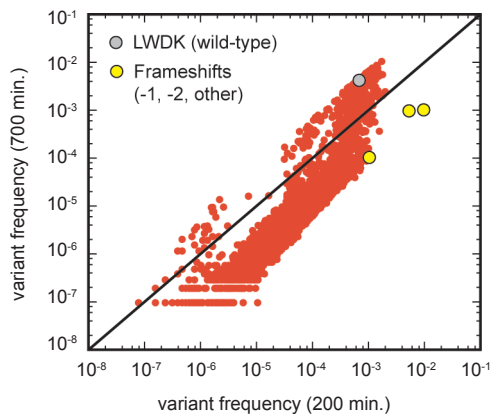

D

| mutations | scored | functional ( $W > 0.5$ ) |
|-----------|--------|--------------------------|
| 0         | 1      | 1 (100%)                 |
| 1         | 37     | 31 (84%)                 |
| 2         | 499    | 189 (38%)                |
| 3         | 2798   | 31 (1%)                  |
| 4         | 5859   | 0 (0%)                   |

E

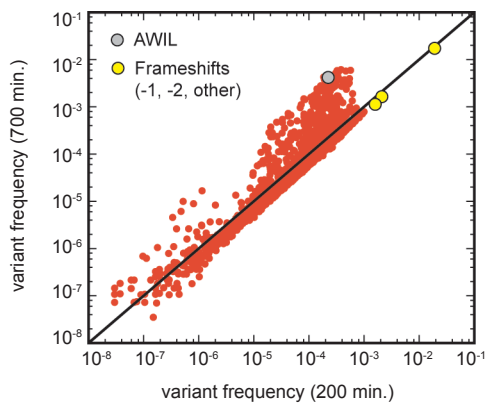

F

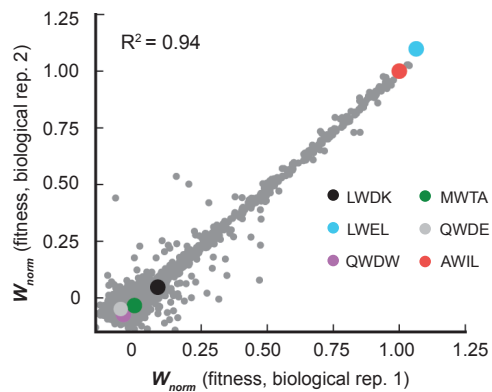

Supplement: NIHMS727721-supplement-7.pdf [file NIHMS727721-supplement-7.pdf]

A

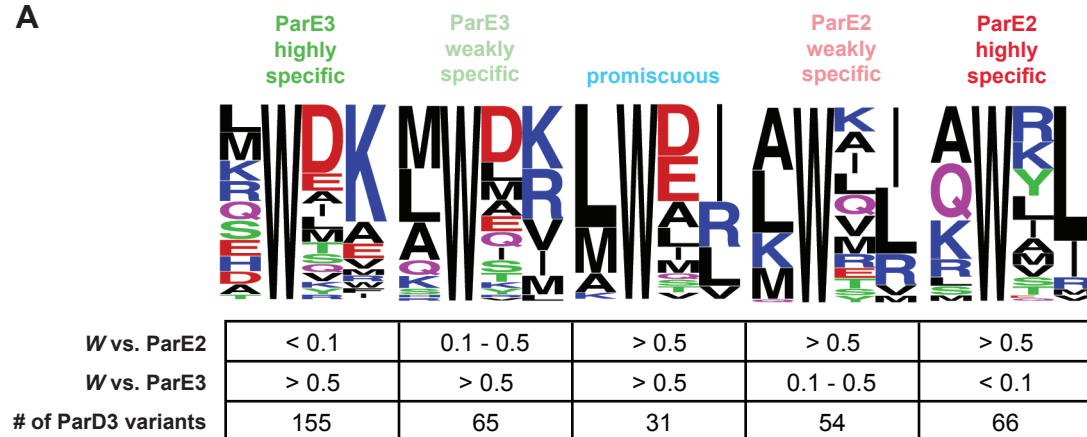

B

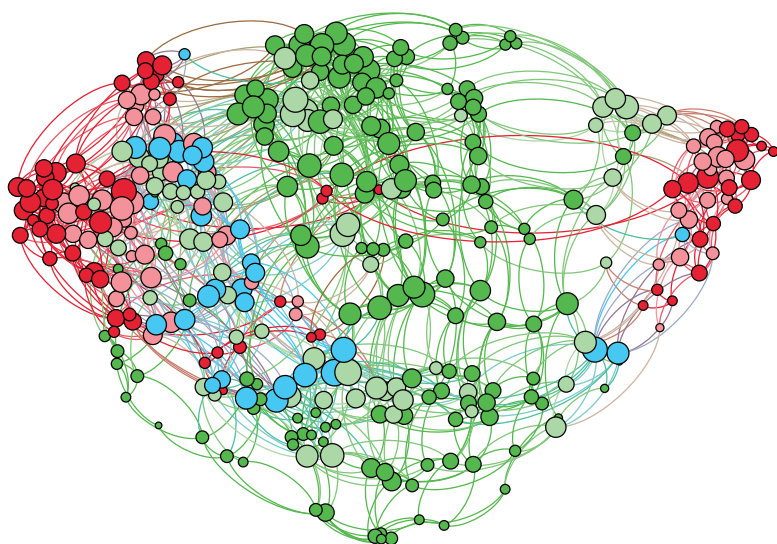

E

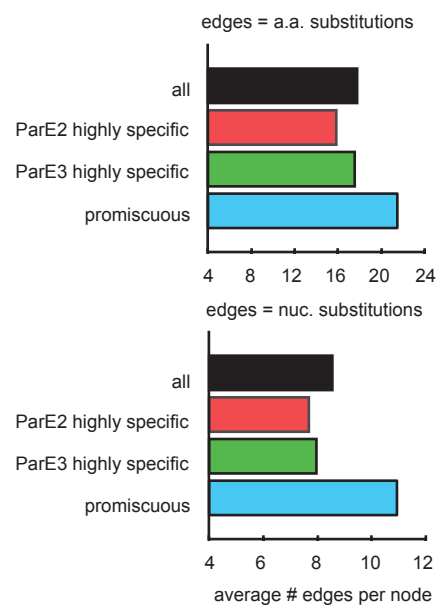

C

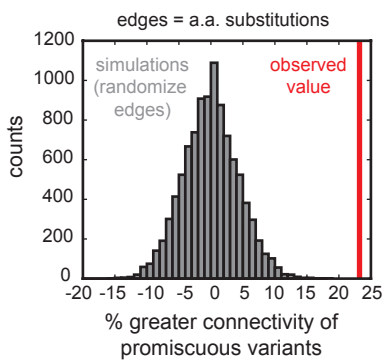

D

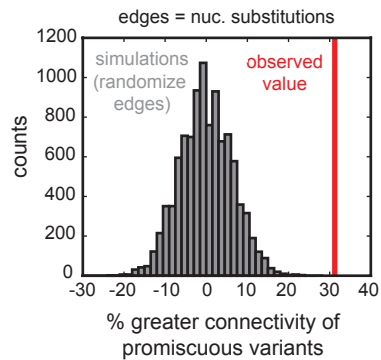

F

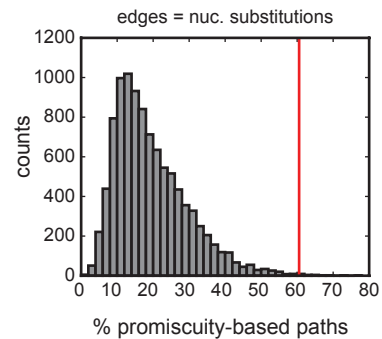

Supplement: NIHMS727721-supplement-8.pdf [file NIHMS727721-supplement-8.pdf]
